# Supplementary material for: Comparative Analysis of Purine Alkaloids and Main Quality Components of the Three Camellia Species in China
Source: MDPI journal article supplement (doi:10.3390/foods11050627), 2022-02-22
Supplement: s1 [file s1]

## Supporting Data:

**Table S1:**

**Regression Equations, Linear Ranges, and Correlation Coefficients of  
Eight Catechin Standards**

| Remain<br>Time/min | Standard | Regression equation    | Correlation coefficient |
|--------------------|----------|------------------------|-------------------------|
| 5.592              | GC       | $y=1.50847x-4.10248$   | 0.99855                 |
| 11.882             | EGC      | $y=2.38286x-1.23412$   | 0.99987                 |
| 12.122             | C        | $y=7.53476-11.82592$   | 0.99942                 |
| 17.919             | EGCG     | $y=15.87146x-13.21842$ | 0.99969                 |
| 20.447             | EC       | $y=7.89751x+13.38833$  | 0.99948                 |
| 22.664             | GCG      | $y=30.51781x-24.01094$ | 0.99818                 |
| 27.542             | ECG      | $y=19.61237x+10.05051$ | 0.99968                 |
| 30.864             | CG       | $y=16.85687x-9.04830$  | 0.99834                 |

**Table S2:**

**Regression Equations, Linear Ranges, and Correlation Coefficients of  
Four Alkaloids Standards**

| Remain<br>Time/min | Standard     | Regression equation    | Correlation<br>coefficient |
|--------------------|--------------|------------------------|----------------------------|
| 6.336              | theobromine  | $y=3.31606x-38.15348$  | 0.99755                    |
| 11.178             | theophylline | $y=12.30516x+35.30343$ | 0.99993                    |
| 18.848             | theacrine    | $y=7.53476-11.82592$   | 0.99993                    |
| 23.708             | caffeine     | $y=15.87146x-13.21842$ | 0.9999                     |

**Table S3:****Contents of purine alkaloids in three *Camellia* species**

| <i>Csp</i> |           |             |              |           |
|------------|-----------|-------------|--------------|-----------|
| Number     | Caffeine  | Theobromine | Theophylline | Theacrine |
| 1          | 3.09±0.01 | 1.27±0.01   | 0.00±0.00    | 0.00±0.00 |
| 2          | 2.30±0.01 | 1.49±0.00   | 0.00±0.00    | 0.00±0.00 |
| 3          | 1.31±0.01 | 0.38±0.01   | 0.00±0.00    | 0.00±0.00 |
| 4          | 0.33±0.02 | 4.42±0.00   | 0.00±0.00    | 0.00±0.00 |
| 5          | 0.25±0.01 | 1.95±0.01   | 0.00±0.00    | 0.00±0.00 |
| 6          | 0.09±0.01 | 2.00±0.00   | 0.00±0.00    | 0.00±0.00 |
| 7          | 0.04±0.00 | 3.22±0.01   | 0.00±0.00    | 0.00±0.00 |
| 8          | 0.04±0.00 | 3.09±0.00   | 0.00±0.00    | 0.00±0.00 |
| 9          | 0.04±0.01 | 2.81±0.01   | 0.00±0.00    | 0.00±0.00 |
| 10         | 0.03±0.00 | 5.06±0.01   | 0.00±0.00    | 0.00±0.00 |
| 11         | 0.03±0.00 | 4.33±0.01   | 0.00±0.00    | 0.00±0.00 |
| 12         | 0.03±0.01 | 3.51±0.01   | 0.00±0.00    | 0.00±0.00 |
| 13         | 0.03±0.00 | 2.14±0.00   | 0.19±0.00    | 0.00±0.00 |
| 14         | 0.02±0.00 | 4.39±0.01   | 0.00±0.00    | 0.00±0.00 |
| 15         | 0.02±0.00 | 3.76±0.01   | 0.00±0.00    | 0.00±0.00 |
| 16         | 0.02±0.00 | 3.18±0.00   | 0.00±0.00    | 0.00±0.00 |
| 17         | 0.02±0.00 | 2.83±0.00   | 0.00±0.00    | 0.00±0.00 |
| 18         | 0.02±0.00 | 2.78±0.00   | 0.00±0.00    | 0.00±0.00 |
| 19         | 0.02±0.00 | 2.69±0.00   | 0.00±0.00    | 0.00±0.00 |
| 20         | 0.02±0.00 | 2.40±0.01   | 0.22±0.00    | 0.00±0.00 |
| 21         | 0.02±0.00 | 2.35±0.01   | 0.00±0.00    | 0.00±0.00 |
| 22         | 0.02±0.00 | 1.79±0.00   | 0.00±0.00    | 0.00±0.00 |
| 23         | 0.01±0.00 | 4.89±0.02   | 0.00±0.00    | 0.00±0.00 |
| 24         | 0.01±0.00 | 2.97±0.01   | 0.00±0.00    | 0.00±0.00 |
| 25         | 0.01±0.00 | 2.40±0.01   | 0.00±0.00    | 0.00±0.00 |
| 26         | 0.01±0.00 | 1.93±0.00   | 0.18±0.00    | 0.00±0.00 |
| 27         | 0.01±0.00 | 5.25±0.01   | 0.00±0.00    | 0.00±0.00 |
| 28         | 0.01±0.00 | 4.99±0.01   | 0.00±0.00    | 0.00±0.00 |
| 29         | 0.00±0.00 | 4.90±0.01   | 0.00±0.00    | 0.00±0.00 |
| 30         | 0.00±0.00 | 4.88±0.01   | 0.00±0.00    | 0.00±0.00 |
| 31         | 0.00±0.00 | 3.85±0.00   | 0.00±0.00    | 0.00±0.00 |
| 32         | 0.00±0.00 | 3.83±0.05   | 0.00±0.00    | 0.00±0.00 |
| 33         | 0.00±0.00 | 3.79±0.01   | 0.26±0.00    | 0.00±0.00 |
| 34         | 0.00±0.00 | 3.71±0.01   | 0.27±0.01    | 0.00±0.00 |
| 35         | 0.00±0.00 | 3.67±0.01   | 0.00±0.00    | 0.00±0.00 |
| 36         | 0.00±0.00 | 3.55±0.01   | 0.00±0.00    | 0.00±0.00 |
| 37         | 0.00±0.00 | 3.15±0.00   | 0.23±0.01    | 0.00±0.00 |
| 38         | 0.00±0.00 | 3.12±0.00   | 0.00±0.00    | 0.00±0.00 |
| 39         | 0.00±0.00 | 2.86±0.01   | 0.00±0.00    | 0.00±0.00 |
| 40         | 0.00±0.00 | 2.55±0.00   | 0.29±0.00    | 0.00±0.00 |
| 41         | 0.00±0.00 | 2.48±0.02   | 0.00±0.00    | 0.00±0.00 |
| 42         | 0.00±0.00 | 2.46±0.00   | 0.00±0.00    | 0.00±0.00 |

|    |           |           |           |           |
|----|-----------|-----------|-----------|-----------|
| 43 | 0.00±0.00 | 2.42±0.00 | 0.00±0.00 | 0.00±0.00 |
| 44 | 0.00±0.00 | 2.40±0.01 | 0.00±0.00 | 0.00±0.00 |
| 45 | 0.00±0.00 | 2.33±0.00 | 0.14±0.00 | 0.00±0.00 |
| 46 | 0.00±0.00 | 2.08±0.01 | 0.00±0.00 | 0.00±0.00 |
| 47 | 0.00±0.00 | 2.06±0.01 | 0.13±0.00 | 0.00±0.00 |
| 48 | 0.00±0.00 | 2.05±0.00 | 0.00±0.00 | 0.00±0.00 |
| 49 | 0.00±0.00 | 1.72±0.00 | 0.00±0.00 | 0.00±0.00 |
| 50 | 0.00±0.00 | 1.70±0.00 | 0.00±0.00 | 0.00±0.00 |
| 51 | 0.00±0.00 | 1.56±0.01 | 0.00±0.00 | 0.00±0.00 |
| 52 | 0.00±0.00 | 0.78±0.01 | 0.00±0.00 | 0.00±0.00 |

*CcC*

| Number | Caffeine  | Theobromine | Theophylline | Theacrine |
|--------|-----------|-------------|--------------|-----------|
| 1      | 2.46±0.07 | 3.07±0.06   | 0.00±0.00    | 0.00±0.00 |
| 2      | 3.60±0.02 | 2.77±0.05   | 0.00±0.00    | 0.00±0.00 |
| 3      | 2.98±0.07 | 2.17±0.06   | 0.00±0.00    | 0.00±0.00 |
| 4      | 2.13±0.07 | 2.76±0.54   | 0.33±0.02    | 0.03±0.01 |
| 5      | 3.63±0.03 | 2.51±0.02   | 0.00±0.00    | 0.00±0.00 |
| 6      | 3.06±0.04 | 2.09±0.02   | 0.00±0.00    | 0.00±0.00 |
| 7      | 2.74±0.05 | 1.53±0.04   | 0.00±0.00    | 0.00±0.00 |
| 8      | 2.31±0.03 | 2.38±0.01   | 0.09±0.15    | 0.00±0.00 |
| 9      | 2.61±0.04 | 2.15±0.02   | 0.18±0.15    | 0.00±0.00 |
| 10     | 1.36±0.03 | 1.80±0.04   | 0.00±0.00    | 0.00±0.00 |
| 11     | 3.42±0.03 | 0.68±0.02   | 0.00±0.00    | 0.00±0.00 |
| 12     | 1.11±0.01 | 0.57±0.03   | 0.00±0.00    | 0.00±0.00 |
| 13     | 0.01±0.01 | 2.99±0.02   | 0.00±0.00    | 0.00±0.00 |
| 14     | 2.75±0.02 | 3.18±0.03   | 0.00±0.00    | 0.00±0.00 |
| 15     | 1.01±0.02 | 0.49±0.01   | 0.52±0.03    | 0.00±0.00 |
| 16     | 3.02±0.01 | 0.65±0.02   | 0.00±0.00    | 0.00±0.00 |
| 17     | 0.61±0.03 | 2.43±0.02   | 0.00±0.00    | 0.00±0.00 |
| 18     | 2.29±0.02 | 2.91±0.05   | 0.00±0.00    | 0.00±0.00 |
| 19     | 0.96±0.02 | 1.79±0.03   | 0.00±0.00    | 0.00±0.00 |
| 20     | 1.74±0.02 | 2.21±0.02   | 0.64±0.02    | 0.00±0.00 |
| 21     | 2.83±0.04 | 3.04±0.03   | 0.00±0.00    | 0.00±0.00 |
| 22     | 1.52±0.02 | 0.76±0.02   | 0.00±0.00    | 0.00±0.00 |
| 23     | 0.30±0.02 | 2.53±0.02   | 0.00±0.00    | 0.00±0.00 |
| 24     | 2.13±0.01 | 0.96±0.02   | 0.00±0.00    | 0.00±0.00 |
| 25     | 2.00±0.05 | 2.43±0.02   | 0.13±0.02    | 0.02±0.01 |
| 26     | 0.59±0.02 | 1.47±0.02   | 0.00±0.00    | 0.00±0.00 |
| 27     | 1.77±0.01 | 0.32±0.02   | 0.00±0.00    | 0.00±0.00 |
| 28     | 0.00±0.00 | 2.38±0.02   | 0.51±0.02    | 0.08±0.01 |
| 29     | 1.90±0.03 | 1.83±0.02   | 0.00±0.00    | 0.00±0.00 |
| 30     | 2.52±0.02 | 1.06±0.02   | 0.00±0.00    | 0.00±0.00 |
| 31     | 1.72±0.01 | 1.06±0.02   | 0.00±0.00    | 0.00±0.00 |
| 32     | 1.26±0.02 | 1.87±0.02   | 0.00±0.00    | 0.00±0.00 |
| 33     | 2.55±0.02 | 0.97±0.02   | 0.04±0.01    | 0.00±0.00 |
| 34     | 2.02±0.01 | 0.43±0.02   | 0.00±0.00    | 0.00±0.00 |
| 35     | 1.43±0.02 | 1.33±0.02   | 0.00±0.00    | 0.00±0.00 |

|    |           |           |           |           |
|----|-----------|-----------|-----------|-----------|
| 36 | 1.59±0.03 | 2.09±0.03 | 0.00±0.00 | 0.00±0.00 |
| 37 | 0.91±0.02 | 1.68±0.02 | 0.31±0.02 | 0.00±0.00 |
| 38 | 2.39±0.02 | 2.06±0.02 | 0.00±0.00 | 0.00±0.00 |

*CgC*

| Number | Caffeine  | Theobromine | Theophylline | Theacrine |
|--------|-----------|-------------|--------------|-----------|
| 1      | 0.00±0.00 | 1.03±0.02   | 0.00±0.00    | 0.00±0.00 |
| 2      | 0.00±0.00 | 2.43±0.02   | 0.00±0.00    | 0.00±0.00 |
| 3      | 0.00±0.00 | 2.34±0.02   | 0.00±0.00    | 0.00±0.00 |
| 4      | 0.00±0.00 | 2.87±0.02   | 0.00±0.00    | 0.00±0.00 |
| 5      | 0.00±0.00 | 2.02±0.01   | 0.00±0.00    | 0.00±0.00 |
| 6      | 0.00±0.00 | 2.31±0.02   | 0.00±0.00    | 0.00±0.00 |
| 7      | 0.00±0.00 | 3.04±0.02   | 0.00±0.00    | 0.00±0.00 |
| 8      | 0.00±0.00 | 3.27±0.02   | 0.00±0.00    | 0.00±0.00 |
| 9      | 0.00±0.00 | 2.61±0.02   | 0.00±0.00    | 0.00±0.00 |
| 10     | 0.00±0.00 | 2.02±0.01   | 0.00±0.00    | 0.00±0.00 |
| 11     | 0.00±0.00 | 1.84±0.02   | 0.00±0.00    | 0.00±0.00 |
| 12     | 0.00±0.00 | 1.54±0.02   | 0.00±0.00    | 0.00±0.00 |
| 13     | 0.00±0.00 | 1.37±0.02   | 0.00±0.00    | 0.00±0.00 |
| 14     | 0.00±0.00 | 1.77±0.02   | 0.00±0.00    | 0.00±0.00 |
| 15     | 0.00±0.00 | 2.51±0.02   | 0.00±0.00    | 0.00±0.00 |
| 16     | 0.00±0.00 | 2.18±0.01   | 0.00±0.00    | 0.00±0.00 |
| 17     | 0.00±0.00 | 0.97±0.01   | 0.00±0.00    | 0.00±0.00 |
| 18     | 0.00±0.00 | 2.22±0.01   | 0.00±0.00    | 0.00±0.00 |
| 19     | 0.00±0.00 | 2.45±0.02   | 0.00±0.00    | 0.00±0.00 |
| 20     | 0.00±0.00 | 2.59±0.29   | 0.00±0.00    | 0.00±0.00 |
| 21     | 0.00±0.00 | 2.52±0.02   | 0.00±0.00    | 0.00±0.00 |
| 22     | 0.00±0.00 | 2.41±0.02   | 0.00±0.00    | 0.00±0.00 |
| 23     | 0.00±0.00 | 1.98±0.02   | 0.00±0.00    | 0.00±0.00 |
| 24     | 0.00±0.00 | 2.12±0.01   | 0.00±0.00    | 0.00±0.00 |
| 25     | 0.00±0.00 | 2.35±0.01   | 0.00±0.00    | 0.00±0.00 |
| 26     | 0.00±0.00 | 2.75±0.01   | 0.00±0.00    | 0.00±0.00 |
| 27     | 0.00±0.00 | 1.93±0.03   | 0.00±0.00    | 0.00±0.00 |
| 28     | 0.00±0.00 | 2.62±0.01   | 0.00±0.00    | 0.00±0.00 |
| 29     | 0.00±0.00 | 2.43±0.02   | 0.00±0.00    | 0.00±0.00 |
| 30     | 0.00±0.00 | 2.33±0.03   | 0.00±0.00    | 0.00±0.00 |
| 31     | 0.00±0.00 | 1.86±0.02   | 0.00±0.00    | 0.00±0.00 |
| 32     | 0.00±0.00 | 2.25±0.01   | 0.00±0.00    | 0.00±0.00 |
| 33     | 0.00±0.00 | 1.88±0.02   | 0.00±0.00    | 0.00±0.00 |
| 34     | 0.00±0.00 | 1.05±0.02   | 0.00±0.00    | 0.00±0.00 |
| 35     | 0.00±0.00 | 1.34±0.02   | 0.00±0.00    | 0.00±0.00 |
| 36     | 0.00±0.00 | 3.64±0.02   | 0.00±0.00    | 0.00±0.00 |

Note: Values are mean ± SD. All units are percentage of dry weight.

Figure S1:

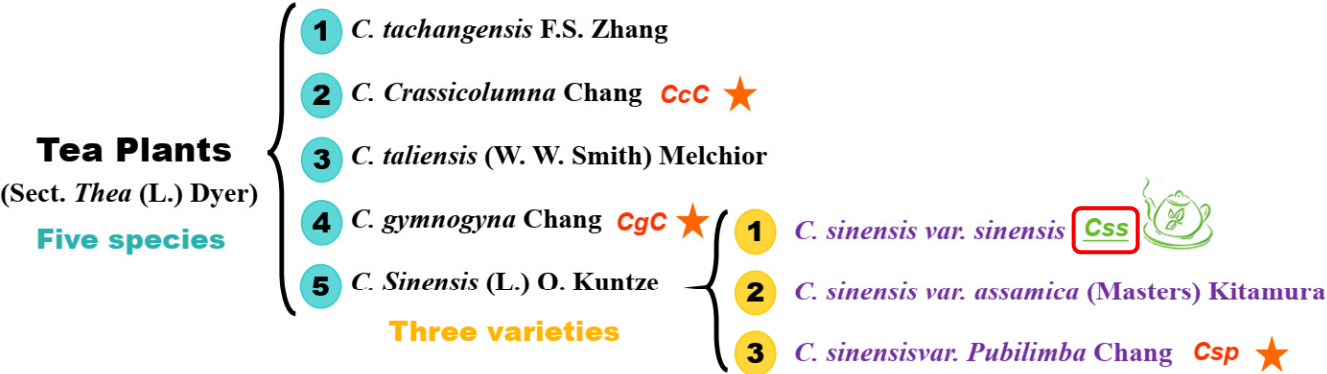

Schematic diagram of the classification of tea plants

The *genus Thea* can be divided into five species, of which *C. Sinensis* (L.) O. Kuntze includes three varieties.  
★ : indicates the three species of *Thea* surveyed in the current study. *Css* is the variety commonly cultivated and consumed around the world as tea.

**Figure S2:**

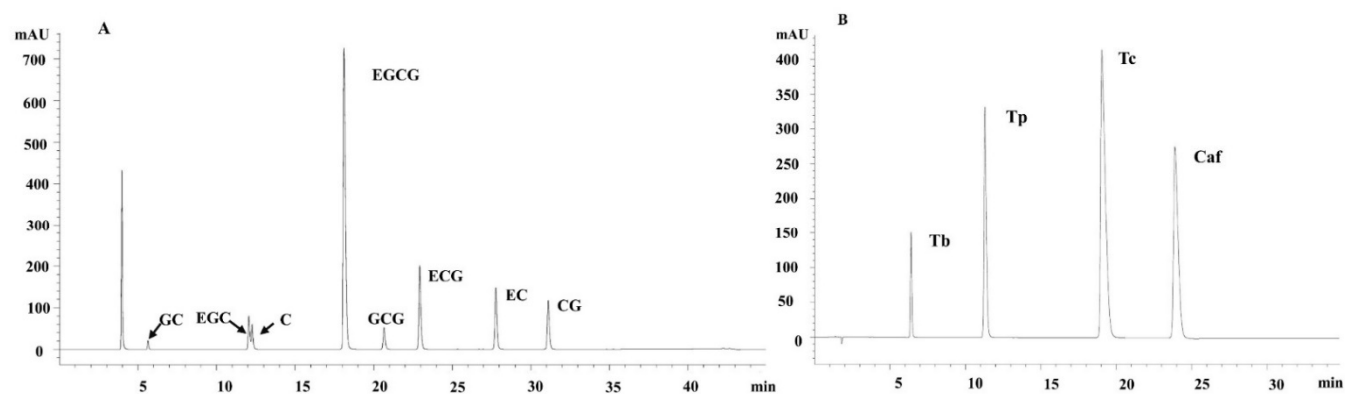

Note: A. Standard for eight catechins; B. Standard for four purine alkaloids.

GC, (+)-galocatechin; EGC, (-)-epigallocatechin; C, (+)-catechin; EGCG, (-)-epigallocatechin gallate; GCG, (-)-galocatechin gallate; ECG, (-)-epicatechingallate; EC, (-)-epicatechin; CG, (+)-catechin gallate; Tb, theobromine; Tp, theophylline; Tc, theacrine; Caf, caffeine.
